# Supplementary material for: Thermoresponsive Alginate-Graft-pNIPAM/Methyl Cellulose 3D-Printed Scaffolds Promote Osteogenesis In Vitro
Source: Gels. 2023 Dec 15;9(12):984. doi: 10.3390/gels9120984 (PMC10743144; doi:10.3390/gels9120984)
Supplement: Supplementary file 1 [file gels-09-00984-s001.zip › gels-2739615-supplementary.pdf]

# Thermoresponsive Alginate-Graft-pNIPAM/Methyl Cellulose 3D-Printed Scaffolds Promote Osteogenesis In Vitro

Aikaterini Gialouri <sup>1,†</sup>, Sofia Falia Saravanou <sup>2,†</sup>, Konstantinos Loukelis <sup>3</sup>, Maria Chatzinikolaïdou <sup>3,4,\*</sup>, George Pasparakis <sup>2,\*</sup> and Nikolaos Bouropoulos <sup>1,5,\*</sup>

## <sup>1</sup>H NMR

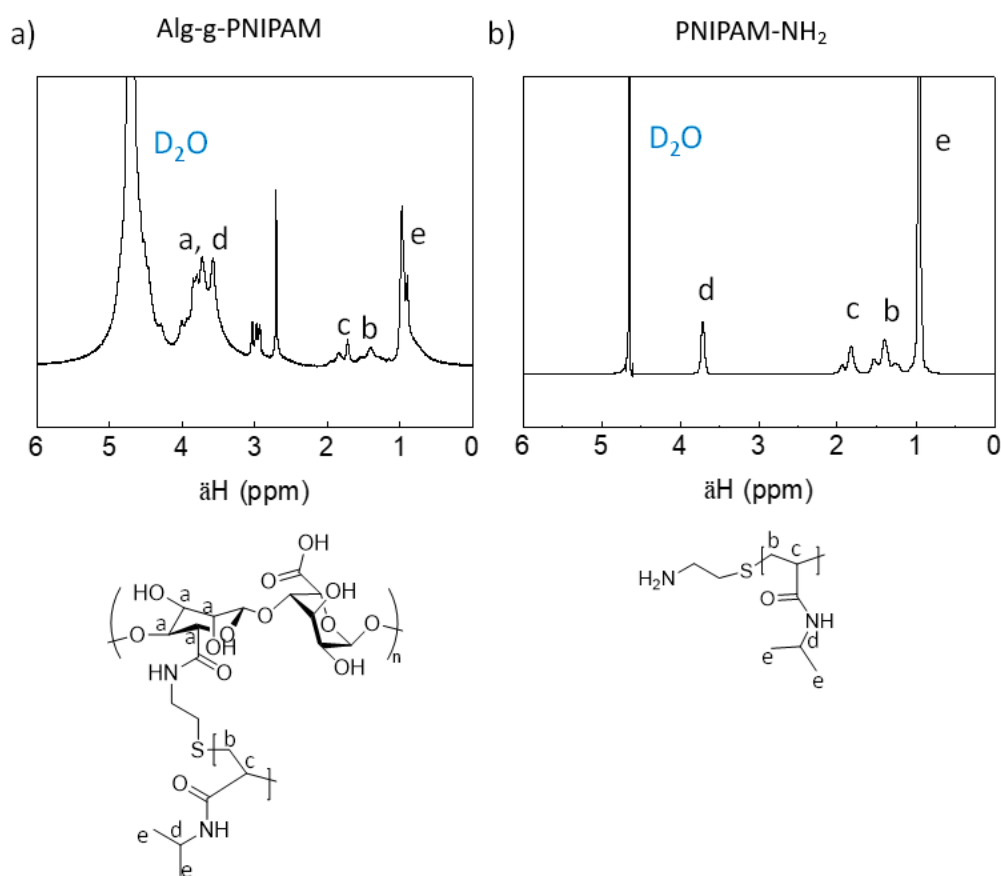

**Figure S1.** <sup>1</sup>H-NMR spectra of a) Alg-g-PNIPAM and of b) PNIPAM-NH<sub>2</sub>.

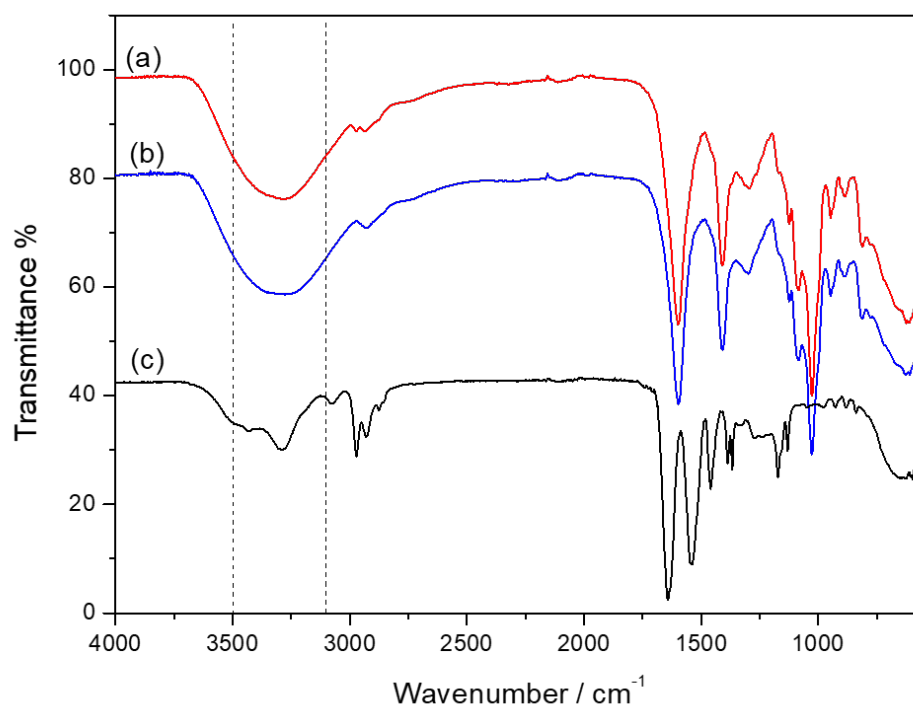

**Figure S2.** FTIR spectra of Alg-g-PNIPAM (a), Alg (b), and PNIPAM-NH<sub>2</sub> (c).
